# Supplementary material
Source: PubMed Central journal article supplement (PMC11311208)
Supplement: NIHMS2009389-supplement-Supplemental_Tables.pdf [file NIHMS2009389-supplement-Supplemental_Tables.pdf]

| Project                   | Model name   | Model architecture | Protein source | Muti-task training objective | Number of proteins | Training objective                                                                                                            |
|---------------------------|--------------|--------------------|----------------|------------------------------|--------------------|-------------------------------------------------------------------------------------------------------------------------------|
| ProSE <sup>30</sup>       | MT-LSTM      | LSTM               | Unifref90      | yes                          | 76,215,872         | Masked token + predicting contact between residues in protein structure + structural similarity of proteins by SCOP hierarchy |
| ProSE <sup>30</sup>       | DLM-LSTM     | LSTM               | Unifref90      | no                           | 76,215,872         | Masked token                                                                                                                  |
| ProteinBERT <sup>29</sup> | ProteinBERT  | Transformer        | Uniref90       | yes                          | ~106M              | Masked token + GO term annotation                                                                                             |
| ProtTrans <sup>28</sup>   | protbert_bfd | Transformer        | BFD            | no                           | 2,122M             | Masked token                                                                                                                  |

**Supplemental Table 1: PLMs evaluated for viral protein VPF functional classification.** Four PLMs were used to embed PHROG VPFs proteins for training and testing the viral function classifier. Model name is name from original study. PLMs were chosen to vary in the model architecture, protein source, and use of multiple training objectives.

| <b>Method</b>        | <b>Recall (%)</b> | <b>Precision (%)</b> | <b>F1-score (%)</b> |
|----------------------|-------------------|----------------------|---------------------|
| PLM-based classifier | 90.32             | 96.88                | 93.48               |
| *DeePVP              | 88.10             | 96.75                | 92.22               |
| *PHANNs              | 91.68             | 76.11                | 83.17               |

**Supplemental Table 3: PLM-based viral protein sequence embedding for phage virion protein (PVP) classification task performance.** PVP classification task designed previously<sup>36</sup> with PHANNs dataset<sup>37</sup>. \* is performance reported previously<sup>36</sup>.

| <b>Category</b>                                   | <b>Support</b> | <b>Precision</b> | <b>Recall</b> | <b>F1-score</b> | <b>FDR</b> | <b>Decision threshold</b> |
|---------------------------------------------------|----------------|------------------|---------------|-----------------|------------|---------------------------|
| DNA, RNA and nucleotide metabolism                | 20,240         | 0.92             | 0.93          | 0.93            | 0.08       | 0.25                      |
| connector                                         | 2,412          | 0.90             | 0.63          | 0.74            | 0.10       | 0.74                      |
| head and packaging                                | 15,601         | 0.90             | 0.80          | 0.85            | 0.10       | 0.41                      |
| integration and excision                          | 484            | 0.99             | 0.91          | 0.95            | 0.01       | 0.46                      |
| lysis                                             | 2,237          | 0.90             | 0.65          | 0.76            | 0.10       | 0.53                      |
| moron, auxiliary metabolic gene and host takeover | 4,414          | 0.90             | 0.72          | 0.80            | 0.10       | 0.64                      |
| other                                             | 7,810          | 0.90             | 0.62          | 0.74            | 0.10       | 0.50                      |
| tail                                              | 12,257         | 0.90             | 0.83          | 0.86            | 0.10       | 0.45                      |
| transcription regulation                          | 682            | 0.94             | 0.87          | 0.90            | 0.06       | 0.29                      |

**Supplemental Table 4: Functional classifier evaluation for EFAM VPFs labeled with PHROGs annotation.** PHROGs functional annotation was assigned to EFAM VPFs using HMM matching. Support indicates how many EFAM VPFs matched PHROG VPFs per category. False discovery rate (FDR) is reported for the category decision threshold.
